# Supplementary material for: Fabrication and growth mechanism of three-dimensional spherical TiO2 architectures consisting of TiO2 nanorods with {110} exposed facets
Source: Royal Society of Chemistry journal article supplement (doi:10.1039/c0nr00151a), 2010-01-01
Supplement: c0nr00151a.pdf [file c0nr00151a.pdf]

## Supporting Information

Fabrication and Growth Mechanism of Three-dimensional Spherical TiO<sub>2</sub> Architectures

Consisting of TiO<sub>2</sub> Nanorods with {110} Exposed Facets

Yan Sang, Bayou Geng\*, and Jie Yang

### Supporting Figures

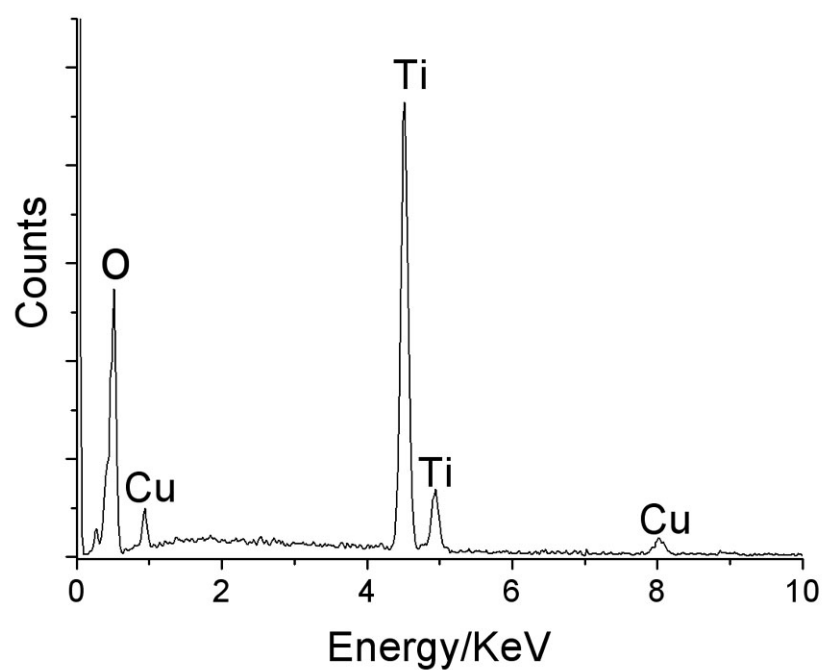

**Figure S1.** EDS pattern of the products obtained from the different nanorods under TEM.

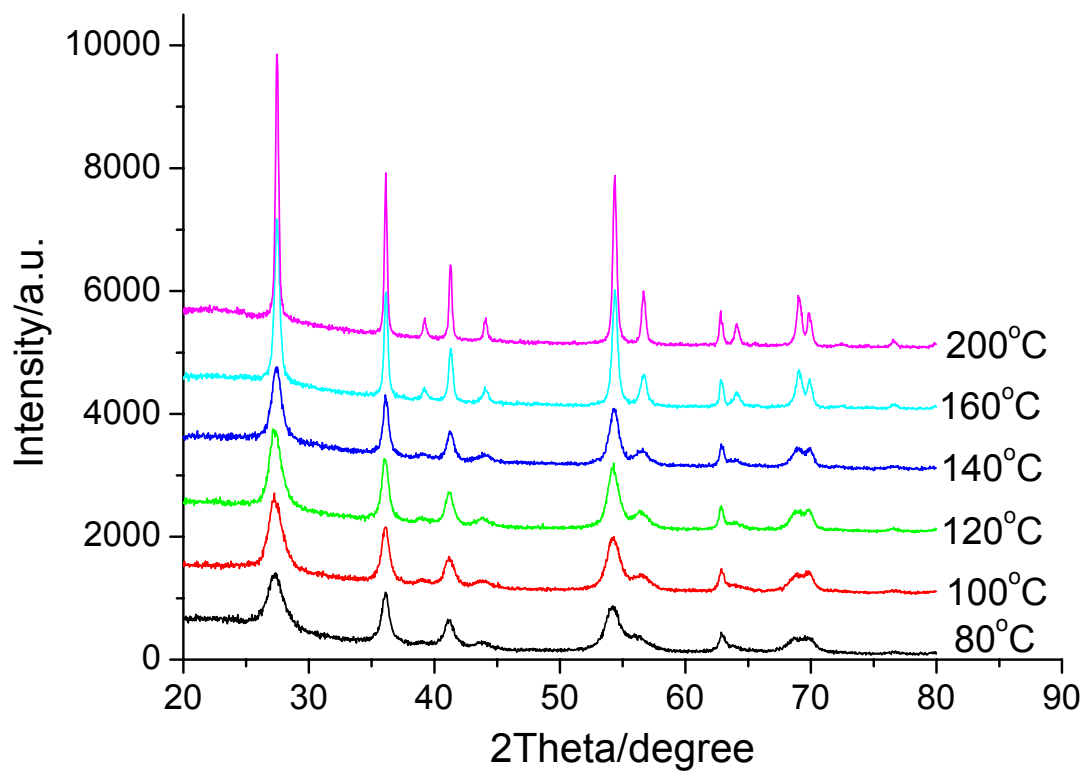

**Figure S2.** The XRD patterns of products obtained at 10 h with different temperatures.

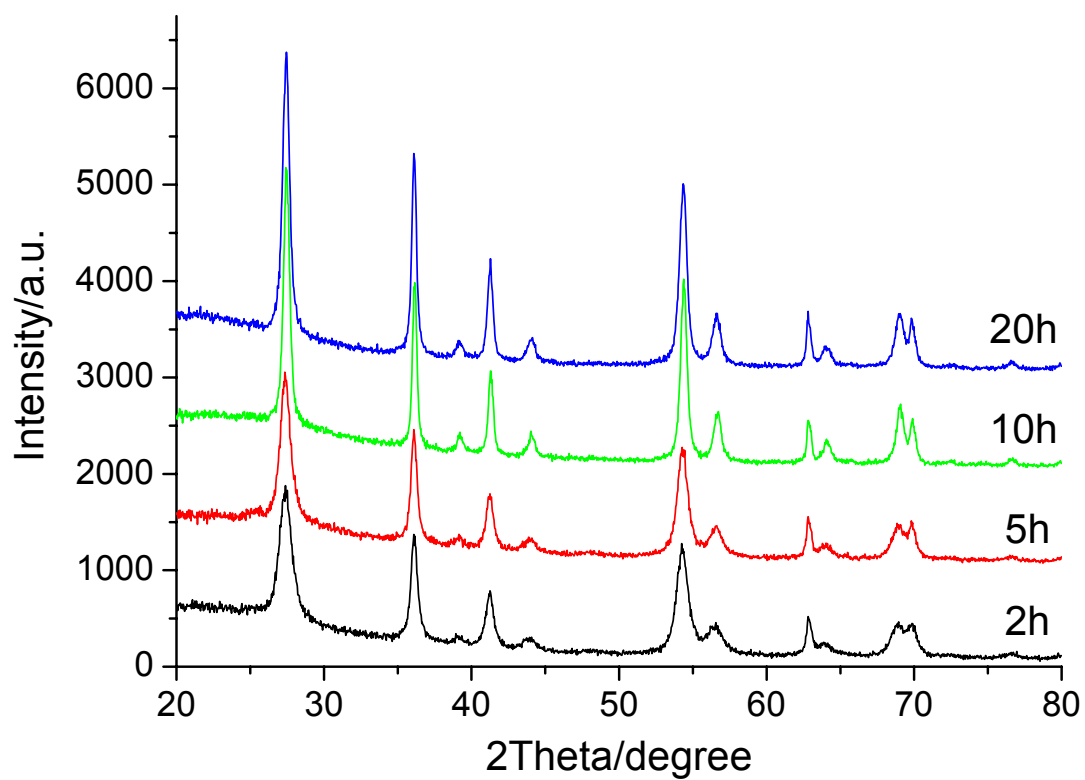

**Figure S3.** The XRD patterns of products obtained at 160 °C with different reaction time.
